# Supplementary material for: A high responsivity and controllable recovery ultraviolet detector based on a WO3gate AlGaN/GaN heterostructure with an integrated micro-heater
Source: Royal Society of Chemistry journal article supplement (doi:10.1039/d0tc00553c), 2020-01-01
Supplement: d0tc00553c1.pdf [file d0tc00553c1.pdf]

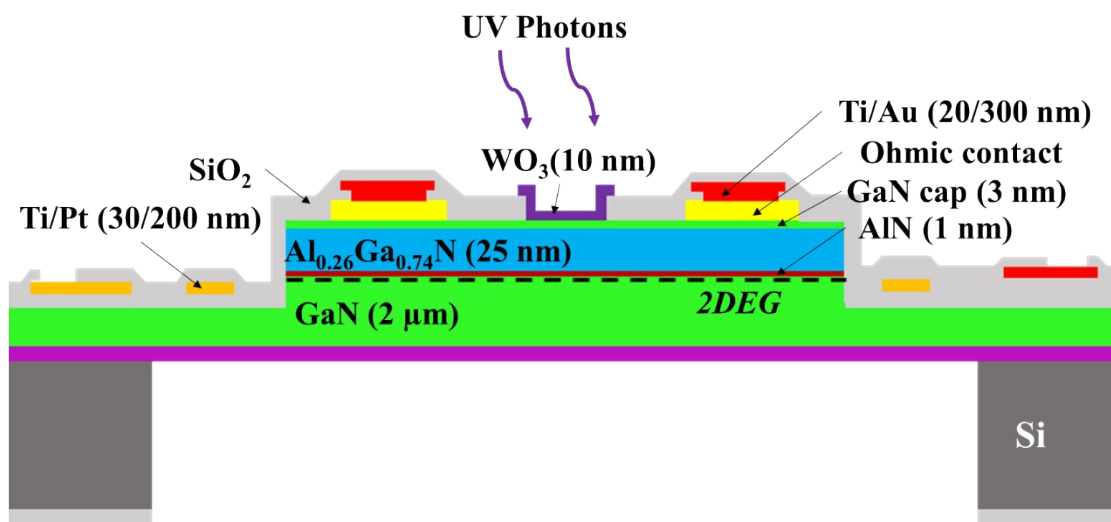

Figure S1 The cross-section schematic drawing of the detector.

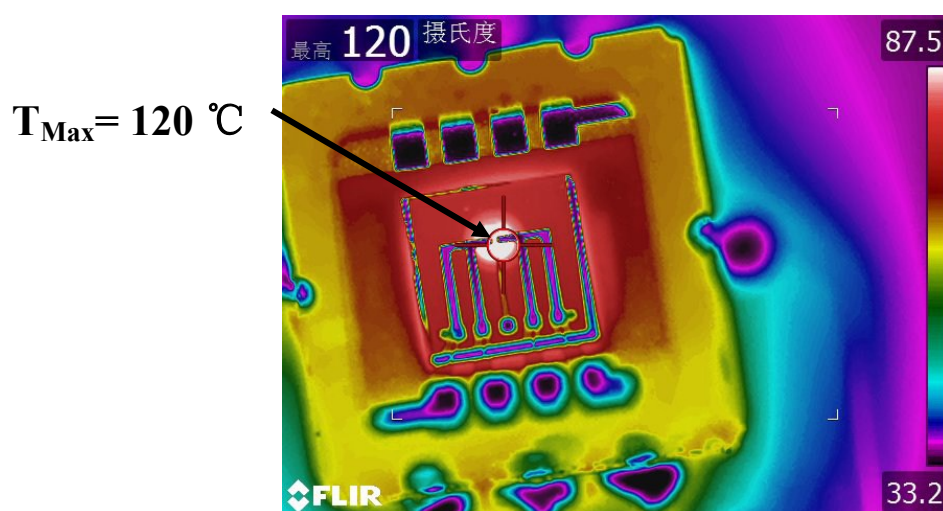

Figure S2 The thermal distribution of the detector surface when  $V_H = 3.7\text{ V}$ .

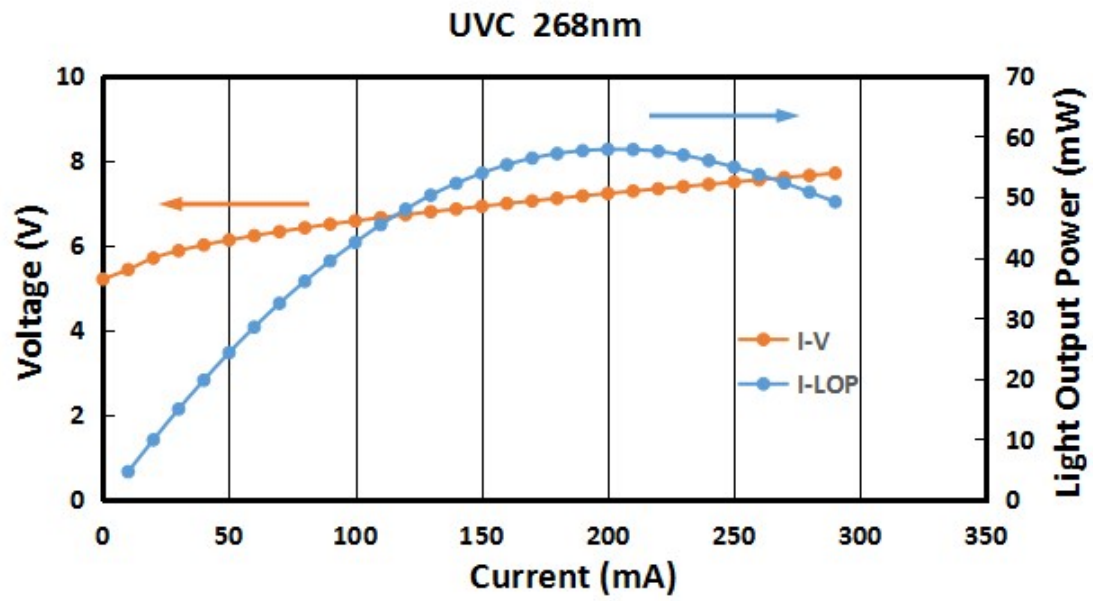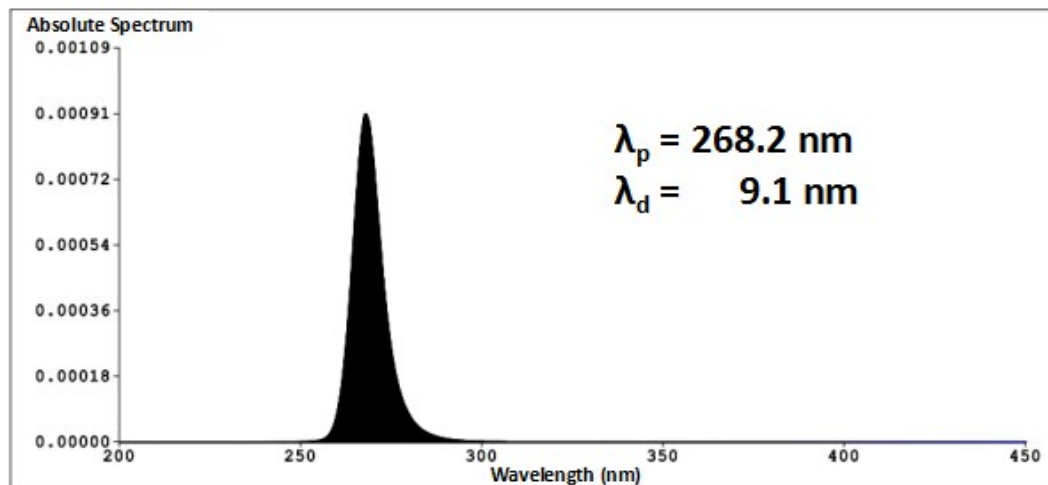

Figure S3 UVC light source: I-V, I-LOP curve and light spectrum.

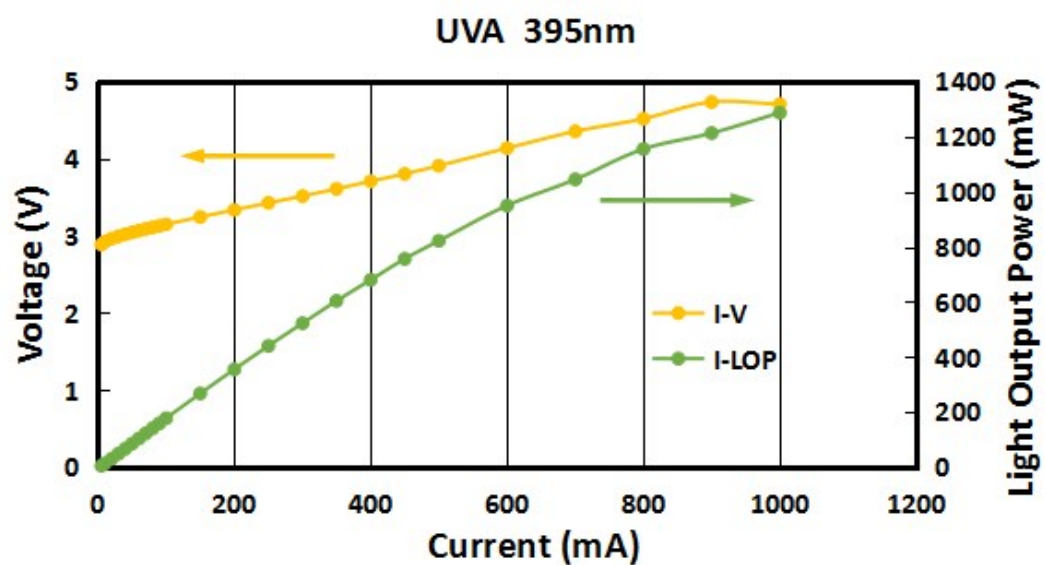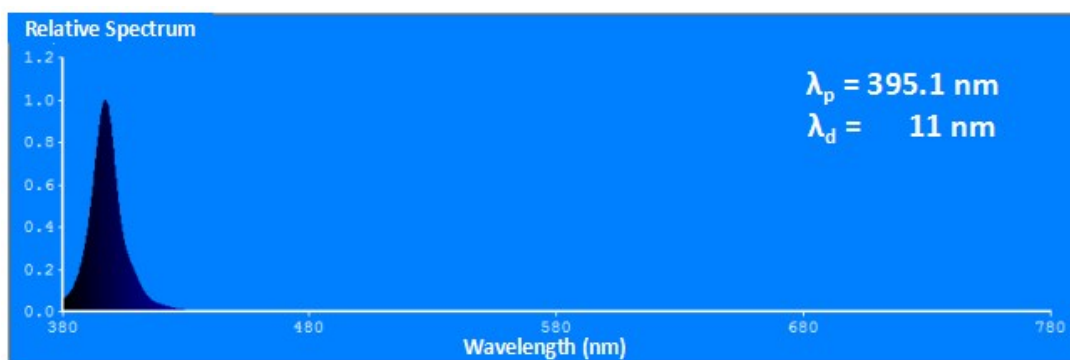

Figure S4 UVA light source: I-V, I-LOP curve and light spectrum.

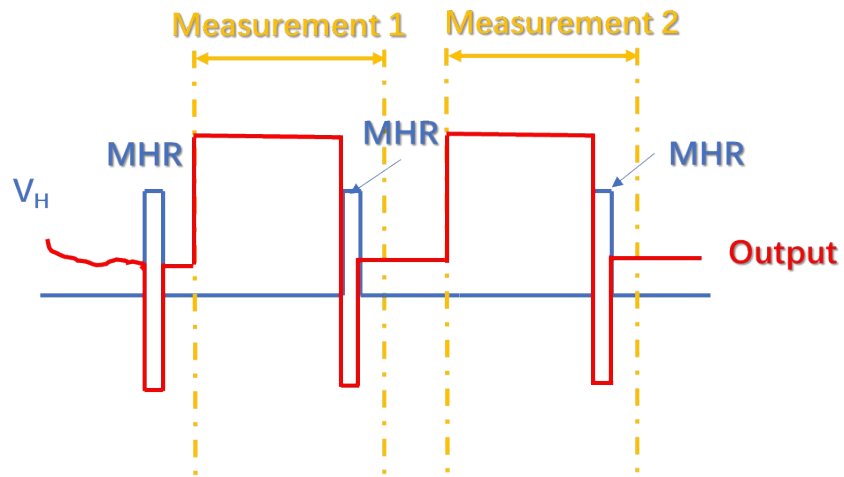

Figure S5 An example illuminates the MHR process before and in measurement.
